# Supplementary material for: Nanoporous gold functionalized with praseodymia–titania mixed oxides as a stable catalyst for the water–gas shift reaction
Source: Royal Society of Chemistry journal article supplement (doi:10.1039/c8cp06040a), 2019-01-01
Supplement: c8cp06040a1.pdf [file c8cp06040a1.pdf]

# **Nanoporous Gold Functionalized with Praseodymia-Titania Mixed Oxides as a Stable Catalysts for the Water-Gas Shift Reaction**

Junjie Shi<sup>a,b</sup>, Arne Wittstock<sup>a,e</sup>, Christoph Mahr<sup>c</sup>, M. Mangir Murshed<sup>d,e</sup>, Thorsten M.  
Gesing<sup>d,e</sup>, Andreas Rosenauer<sup>c,e</sup>, Marcus Bäumer<sup>a,e\*</sup>

*<sup>a</sup>Institute of Applied and Physical Chemistry and Center for Environmental Research  
and Sustainable Technology, University of Bremen, Leobener Str. 6, 28359 Bremen,  
Germany*

*<sup>b</sup>Shandong Applied Research Centre of Gold Nanotechnology, Department of  
Chemistry & Chemical Engineering, Yantai University, Yantai, China*

*<sup>c</sup>Institute of Solid State Physics, University of Bremen, Otto-Hahn- Allee. 1, 28359,  
Bremen, Germany*

*<sup>d</sup>Solid State Chemical Crystallography, Institute of Inorganic Chemistry and  
Crystallography, University of Bremen, Leobener Str. 7, 28359 Bremen, Germany*

*<sup>e</sup>MAPEX Center for Materials and Processes, University of Bremen, Bibliothekstr. 1,  
28359 Bremen, Germany*

\*Corresponding author: Leobener Strasse UFT, Bremen, Germany, Phone: +49 421  
218 63170, Email: mbaeumer@uni-bremen.de

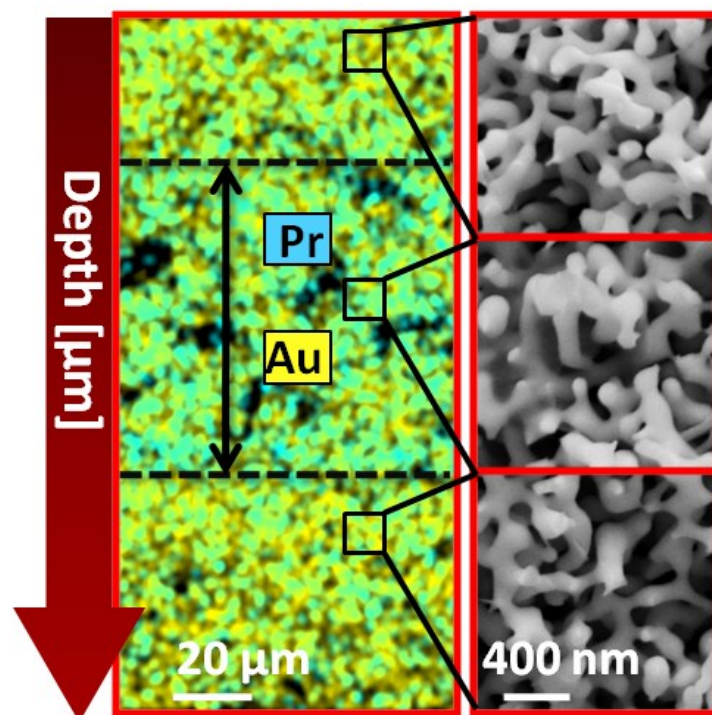

Figure S1. SEM and elemental maps of freshly broken cross-sections of  $\text{PrO}_x/\text{npAu}$  disks acquired at different depths along the cross sections.

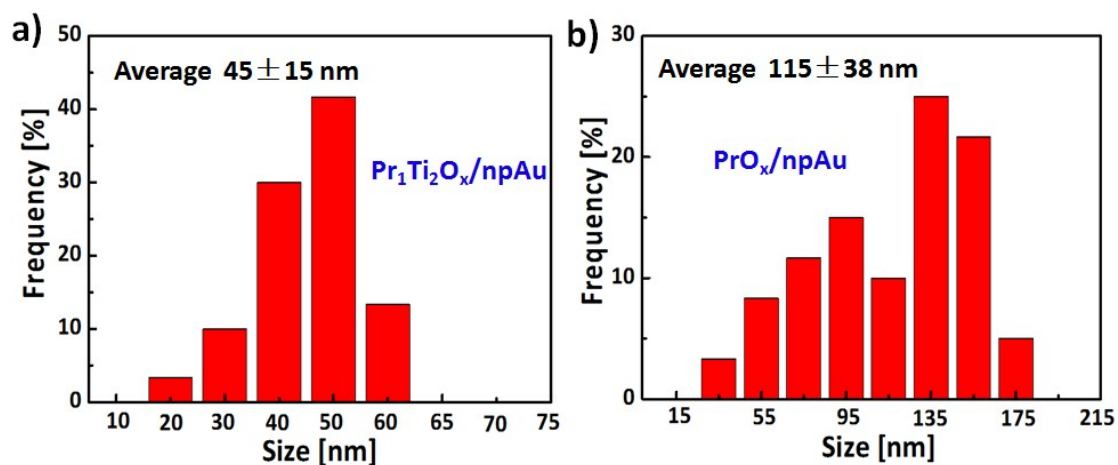

Figure S2. a) and b) show the gold ligament size distributions of  $\text{Pr}_1\text{Ti}_2\text{O}_x/\text{npAu}$  and  $\text{PrO}_x/\text{npAu}$ , respectively. Both samples were first heated to  $450^\circ\text{C}$  in helium and then used for WGS for more than 40h (feed-gas mixture: 5.8 vol% CO, 22 vol%  $\text{H}_2\text{O}$ , helium as carrier gas; total gas flow  $32\text{ mL min}^{-1}$ ).

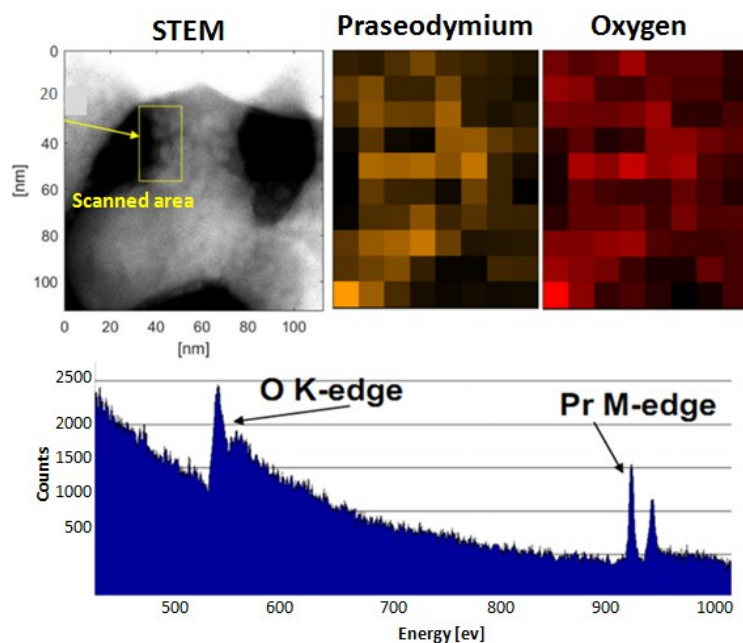

Figure S3. STEM image of  $\text{PrO}_x/\text{npAu}$ , representative EELS spectrum and resulting elemental distribution. Evaluation of O-edge (in red), and Pr-M edge (in brown).

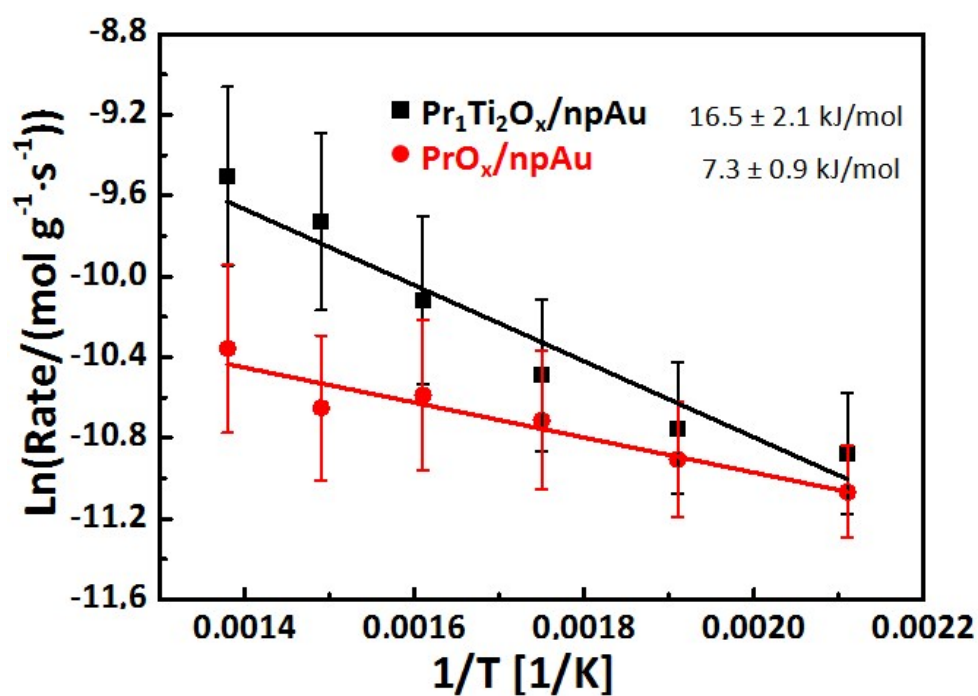

Figure S4. Arrhenius plots of the samples revealing an apparent activation energy of WGS of  $16.5 \pm 2.1$  kJ/mol for  $\text{Pr}_1\text{Ti}_2\text{O}_x/\text{npAu}$  and  $7.3 \pm 0.9$  kJ/mol for  $\text{PrO}_x/\text{npAu}$ .

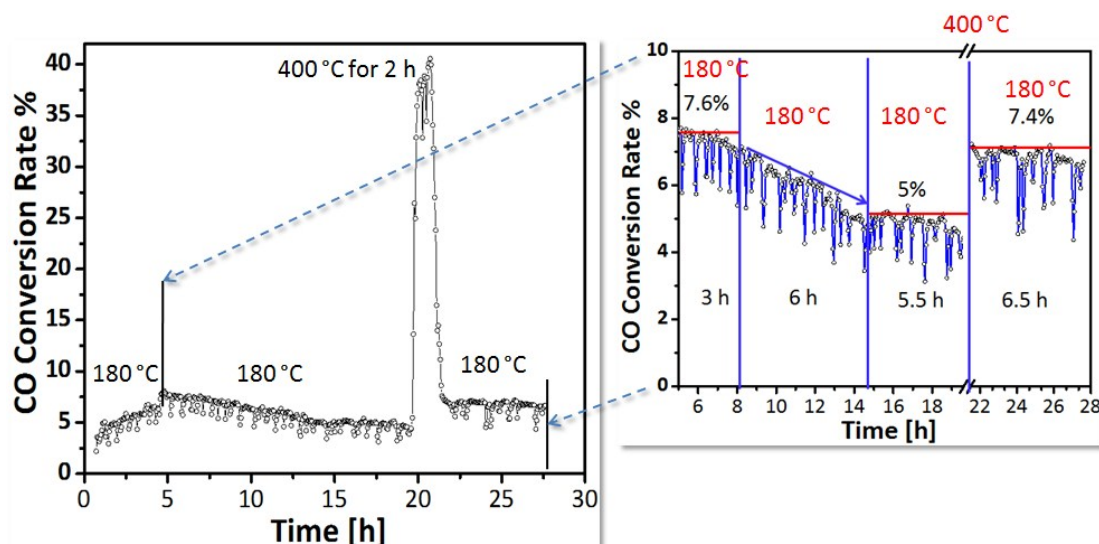

Figure S5. Stability tests carried out with the  $\text{Pr}_1\text{Ti}_2\text{O}_x/\text{npAu}$  catalysts for WGS at 180 °C. Reaction at 180 °C in feed gas; after 20h temperature rise to 400°C for 2 h; cool-down to 180 °C. Feed-gas mixture: 5.8 vol% CO, 22 vol%  $\text{H}_2\text{O}$ , helium as carrier gas; total gas flow  $32 \text{ mL min}^{-1}$ ,  $m_{\text{catal}} = 15.0 \pm 0.2 \text{ mg}$ , space velocity  $128\,000 \text{ mL h}^{-1}\text{g}_{\text{cat}}^{-1}$ . (In the whole process the full feed-gas mixture continuously passed through the reactor without any change.)

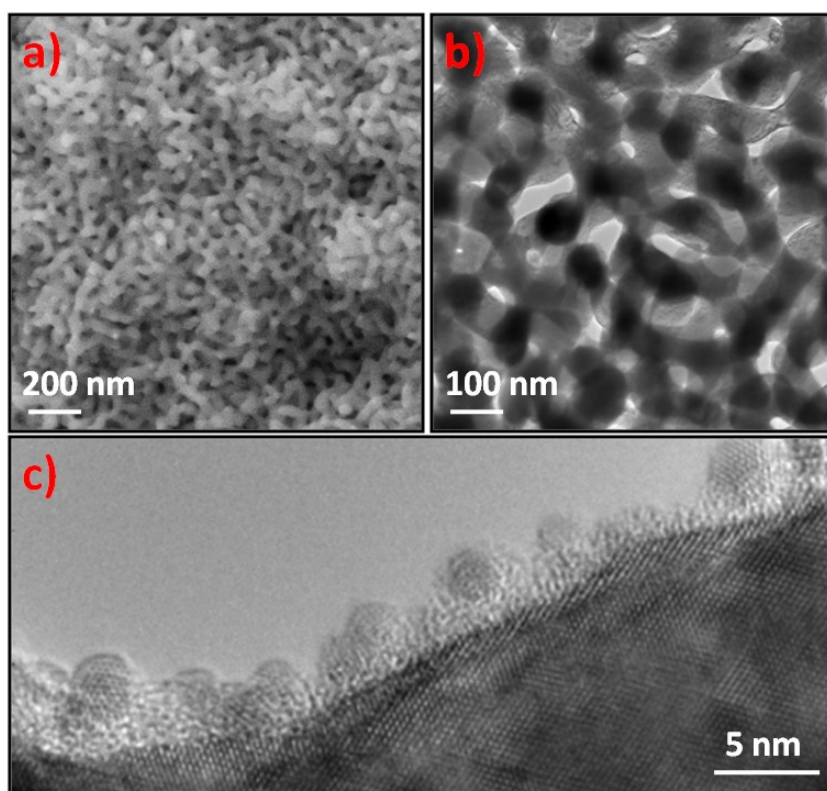

Figure S6. (a) SEM, (b) TEM and (c) HRTEM images of  $\text{Pr}_1\text{Ti}_2\text{O}_x/\text{npAu}$  after WGS at 400 °C for 40h. Feed-gas mixture: 5.8 vol% CO, 22 vol%  $\text{H}_2\text{O}$ , helium as carrier gas.
